# Supplementary material for: Mutations in the Mitochondrial Methionyl-tRNA Synthetase Cause a Neurodegenerative Phenotype in Flies and a Recessive Ataxia (ARSAL) in Humans
Source: PubMed Central journal article supplement (PMC3308940; doi:10.1371/journal.pbio.1001288), 2012-03-20
Supplement: pbio.1001288.s008.pdf [file pbio.1001288.s008.pdf]

**Table S1. Respiration Rates of Isolated Mitochondria from Control and *Aats-met* Mutant Larvae**

|                | Glutamate+Malate <sup>a</sup> |              |          |                 |              |          |                 |              |          | Succinate <sup>a</sup> |              |          |              |              |          |               |              |          |
|----------------|-------------------------------|--------------|----------|-----------------|--------------|----------|-----------------|--------------|----------|------------------------|--------------|----------|--------------|--------------|----------|---------------|--------------|----------|
|                | III <sup>b</sup>              |              |          | IV <sup>c</sup> |              |          | UC <sup>d</sup> |              |          | III                    |              |          | IV           |              |          | UC            |              |          |
| Genotype       | Mean                          | SD           | N        | Mean            | SD           | N        | Mean            | SD           | N        | Mean                   | SD           | N        | Mean         | SD           | N        | Mean          | SD           | N        |
| <b>Control</b> | <b>56.95</b>                  | <b>21.00</b> | <b>6</b> | <b>27.80</b>    | <b>11.02</b> | <b>6</b> | <b>62.76</b>    | <b>23.62</b> | <b>6</b> | <b>62.84</b>           | <b>15.72</b> | <b>6</b> | <b>27.61</b> | <b>7.42</b>  | <b>6</b> | <b>76.19</b>  | <b>30.35</b> | <b>6</b> |
| <i>HV/Def</i>  | <b>52.76</b>                  | <b>20.63</b> | <b>6</b> | <b>27.78</b>    | <b>9.20</b>  | <b>6</b> | <b>39.50</b>    | <b>19.15</b> | <b>6</b> | <b>89.74</b>           | <b>36.31</b> | <b>6</b> | <b>36.95</b> | <b>9.79</b>  | <b>6</b> | <b>75.82</b>  | <b>32.77</b> | <b>6</b> |
| <i>FB/Def</i>  | <b>50.25</b>                  | <b>15.55</b> | <b>6</b> | <b>33.59</b>    | <b>10.36</b> | <b>6</b> | <b>36.95</b>    | <b>17.63</b> | <b>6</b> | <b>127.87</b>          | <b>58.05</b> | <b>6</b> | <b>56.25</b> | <b>22.90</b> | <b>6</b> | <b>112.25</b> | <b>46.04</b> | <b>6</b> |

<sup>a</sup>Respiration rates expressed as ng atomic O/min/mg mitochondrial protein

<sup>b</sup>III = State III (ADP-stimulated) respiration

<sup>c</sup>IV = State IV (ADP-independent) respiration

<sup>d</sup>UC = Uncoupled respiration
