# Supplementary material for: Mutations in the Mitochondrial Methionyl-tRNA Synthetase Cause a Neurodegenerative Phenotype in Flies and a Recessive Ataxia (ARSAL) in Humans
Source: PubMed Central journal article supplement (PMC3308940; doi:10.1371/journal.pbio.1001288), 2012-03-20
Supplement: pbio.1001288.s009.pdf [file pbio.1001288.s009.pdf]

**Table S2. Respiratory Chain Enzyme Activities of Isolated Sonicated Mitochondria from Control and *Aats-met* Mutant Larvae**

| Genotype <sup>f</sup> | Complex I <sup>a</sup> |       |   | Complex II <sup>b</sup> |       |   | Complex III <sup>c</sup> |      |   | Complex IV <sup>d</sup> |       |   | Citrate Synthase <sup>e</sup> |       |   |
|-----------------------|------------------------|-------|---|-------------------------|-------|---|--------------------------|------|---|-------------------------|-------|---|-------------------------------|-------|---|
|                       | Mean                   | SD    | N | Mean                    | SD    | N | Mean                     | SD   | N | Mean                    | SD    | N | Mean                          | SD    | N |
| <b>Control</b>        | 140.62                 | 33.33 | 6 | 85.92                   | 12.43 | 6 | 34.85                    | 3.41 | 6 | 68.18                   | 13.88 | 6 | 194.37                        | 21.15 | 6 |
| <b><i>HV/Def</i></b>  | 72.68                  | 11.87 | 6 | 65.17                   | 23.38 | 6 | 43.28                    | 8.79 | 6 | 64.47                   | 18.57 | 6 | 258.02                        | 35.29 | 6 |
| <b><i>FB/Def</i></b>  | 92.43                  | 24.16 | 6 | 81.77                   | 23.05 | 6 | 31.93                    | 7.63 | 6 | 72.45                   | 29.48 | 6 | 228.31                        | 25.07 | 6 |

<sup>a</sup>NADH:Ubiquinol Oxidoreductase activity in nmol/min/mg protein

<sup>b</sup>Succinate Dehydrogenase activity in nmol/min/mg protein

<sup>c</sup>Ubiquinol:Cytochrome c Oxidoreductase activity in nmol/min/mg protein

<sup>d</sup>Cytochrome c Oxidase activity in nmol/min/mg protein

<sup>e</sup>nmol/min/mg protein
