# Supplementary material for: Mutations in the Mitochondrial Methionyl-tRNA Synthetase Cause a Neurodegenerative Phenotype in Flies and a Recessive Ataxia (ARSAL) in Humans
Source: PubMed Central journal article supplement (PMC3308940; doi:10.1371/journal.pbio.1001288), 2012-03-20
Supplement: pbio.1001288.s010.pdf [file pbio.1001288.s010.pdf]

**Table S3**

| <b>Protein</b> | <b>Complex</b>     | <b>Methionines<br/><i>D. melanogaster</i></b> | <b>Methionines<br/><i>H. sapiens</i></b> |
|----------------|--------------------|-----------------------------------------------|------------------------------------------|
| <b>ND1</b>     | <b>Complex I</b>   | <b>13 / 312 (4.17%)</b>                       | <b>16 / 318 (5.03%)</b>                  |
| <b>ND2</b>     | <b>Complex I</b>   | <b>32 / 341 (9.38%)</b>                       | <b>24 / 346 (6.94%)</b>                  |
| <b>ND3</b>     | <b>Complex I</b>   | <b>6 / 117 (5.13%)</b>                        | <b>8 / 115 (6.96%)</b>                   |
| <b>ND4</b>     | <b>Complex I</b>   | <b>33 / 446 (7.40%)</b>                       | <b>27 / 459 (5.88%)</b>                  |
| <b>ND4L</b>    | <b>Complex I</b>   | <b>11 / 96 (11.46%)</b>                       | <b>10 / 98 (10.20%)</b>                  |
| <b>ND5</b>     | <b>Complex I</b>   | <b>51 / 574 (8.89%)</b>                       | <b>26 / 603 (4.31%)</b>                  |
| <b>ND6</b>     | <b>Complex I</b>   | <b>16 / 174 (9.20%)</b>                       | <b>10 / 174 (5.75%)</b>                  |
| <b>CytB</b>    | <b>Complex III</b> | <b>12 / 378 (3.17%)</b>                       | <b>15 / 380 (3.95%)</b>                  |
| <b>Cox1</b>    | <b>Complex IV</b>  | <b>23 / 511 (4.50%)</b>                       | <b>32 / 513 (6.24%)</b>                  |
| <b>Cox2</b>    | <b>Complex IV</b>  | <b>10 / 228 (4.39%)</b>                       | <b>10 / 227 (4.41%)</b>                  |
| <b>Cox3</b>    | <b>Complex IV</b>  | <b>7 / 262 (2.67%)</b>                        | <b>11 / 261 (4.21%)</b>                  |
| <b>ATP6</b>    | <b>Complex V</b>   | <b>16 / 224 (7.14%)</b>                       | <b>12 / 226 (5.31%)</b>                  |
| <b>ATP8</b>    | <b>Complex V</b>   | <b>4 / 53 (7.55%)</b>                         | <b>6 / 68 (8.82%)</b>                    |
