# Supplementary material for: Mutations in the Mitochondrial Methionyl-tRNA Synthetase Cause a Neurodegenerative Phenotype in Flies and a Recessive Ataxia (ARSAL) in Humans
Source: PubMed Central journal article supplement (PMC3308940; doi:10.1371/journal.pbio.1001288), 2012-03-20
Supplement: pbio.1001288.s011.pdf [file pbio.1001288.s011.pdf]

**Table S4.** ARSAL primers and ABI<sup>®</sup>-based Copy Number Assays for human copy number screening

| <b>ARSAL qPCR Primers</b>    |                                     |                                     |
|------------------------------|-------------------------------------|-------------------------------------|
| <b>PRIMERS</b>               | <b>SEQUENCES</b>                    | <b>PRODUCT SIZE (bp)</b>            |
| GAPDH-f                      | GGTGCCTGATATAGCTTGAC                | 121                                 |
| GAPDH-r                      | GCTGGATGACGTGAGTAAAC                |                                     |
| MARS2.q.F1                   | GCCAGGGTTGGTGGGGC                   | 119                                 |
| MARS2.q.R1                   | CCTTATATATCCGAAAGTTATCATAGTGGTCTGCT |                                     |
| MARS2.q.F2                   | TCTCCTGCACAGATTTTCATCCGCA           | 121                                 |
| MARS2.q.R2                   | CAATACCAACCTTCATAGACGCCCTTG         |                                     |
| MARS2.q.F3                   | TGAGGGTCAGGGTTGGAGGC                | 158                                 |
| MARS2.q.R3                   | TTTAAATGGGGATACACATGGGCAAAAATCA     |                                     |
| BC021693_q1-F                | AATTCCAGTATGCTGCAGTGG               | 205                                 |
| BC021693_q1-R                | TGCAAGGGTCAATGTTATGAG               |                                     |
| BC021693_q1-2F               | CGGGTGTGGTAATGGAG                   | 269                                 |
| BC021693_q1-2R               | TGTAGGAAGATTACTATGTTTCAGCC          |                                     |
| HSP60_F (HSPD1)              | GAGTAGAGGCGGAGGGAGG                 | 121                                 |
| HSP60_R (HSPD1)              | CGTTTGCAGAAATCGTAGCA                |                                     |
| PLCL1_F                      | CCTGAGCAAAAGAAGTTGC                 | 119                                 |
| PLCL1_R                      | GGAGGTAGGATTCTGAGGGC                |                                     |
| <b>ARSAL cDNA Primers</b>    |                                     |                                     |
| <b>PRIMERS</b>               | <b>SEQUENCES</b>                    | <b>PRODUCT SIZE (BP)</b>            |
| MARS2_Cdna_1F                | CACCATGCTGCGAACGTC                  | 284                                 |
| MARS2_Cdna_1R                | CGTCGGTACCAGTGGAGAAT                |                                     |
| MARS2_Cdna_2F                | CTACTGGCGGACGCCCTAT                 | 294                                 |
| MARS2_Cdna_2R                | GACGCCCTTG TAGAGCAGAC               |                                     |
| MARS2_Cdna_3F                | ACAGATTTTCATCCGACCAC                | 386                                 |
| MARS2_Cdna_3R                | TGGCTACTTCTGCGAGACAC                |                                     |
| MARS2_Cdna_4F                | CCGAACCATTTTCATCACGTA               | 380                                 |
| MARS2_Cdna_4R                | GCAAGTCCTAGGATCCACCA                |                                     |
| MARS2_Cdna_5F                | CCATTCCCCTGAGCAGTCT                 | 553                                 |
| MARS2_Cdna_5R                | CCCAAAGACTCGCAAACATT                |                                     |
| MARS2cDNA synthesis-f        | GATGATGCTTGTGATGCGCGCCTAC           | 1668                                |
| MARS2cDNA synthesis-r        | GGTCCGGTGGGCTTTACCAGCCAAG           |                                     |
| MARS2cDNA_5UTR-f             | CACCATGCTGCGAACGTC                  | 2934                                |
| MARS2cDNA_3UTR-r             | CAGTTAAAATTACCTGAAAGTTGTGT          |                                     |
| BC021693_cDNAf               | GCCTTGCAGTTTGATCTCAG                | 951                                 |
| BC021693_cDNAr               | AGGAGACAATCAAAGTATCCTCAG            |                                     |
| <b>ARSAL Genomic Primers</b> |                                     |                                     |
| <b>PRIMERS</b>               | <b>SEQUENCES</b>                    | <b>EXON &amp; PRODUCT SIZE (bp)</b> |
| MARS2_5utr-gc-RPT-f          | TACGAAGGCAAAGAGGTTCCG               | 380                                 |
| MARS2_5utr-gc-RPT-r          | CCTCCAGGAGAGACAGCCTA                |                                     |
| MARS2_(gcn)RPT-f             | CGAGCTGTTTTTCTGGCAAGC               | 221                                 |
| MARS2_(gcn)RPT-R             | TGACAGCACGTGTGAGAGG                 |                                     |
| Mars2_EXON1_A                | CGTTTCATTGGCTTTCCG                  | 886                                 |
| Mars2_EXON1_B                | TACTTCTGCGAGACACGGAC                |                                     |

|                    |                            |                                  |
|--------------------|----------------------------|----------------------------------|
| Mars2_EXON1-2_A    | AGTCCGGAAGCCACTCC          | 875                              |
| Mars2_EXON1-2_B    | AGTACCCAGCCAGGGAGC         |                                  |
| Mars2_EXON1-3_A    | ATATAAGGCTCTGGAGGCCG       | 874                              |
| Mars2_EXON1-3_B    | TCTAGGACACTGGTTCAAGGG      |                                  |
| Mars2_EXON1-4_A    | TTACTGGTGGTTTTACAGGGG      | 871                              |
| Mars2_EXON1-4_B    | AAGCATTGGTCAGTTCCTCC       |                                  |
| Mars2_promoteur_a  | TGATCACACAAATGTGCAAGAA     | 656                              |
| Mars2_promoteur_b  | CAACAAAAGTAGATTTGTGATCTGC  |                                  |
| Mars2_promoteur_2a | TTGGCAAGAACTTGGCAGAT       | 787                              |
| Mars2_promoteur_2b | GCACATCACAAGCATCATCG       |                                  |
| bc021684_EX1a      | CACTTGAGGAGGGAGTCTGC       | 459                              |
| bc021684_EX1b      | CCAGTCAAAGAAAGGGGTGA       |                                  |
| bc021684_EX2a      | ATTTGGGACCTCCCATGTTA       | 488                              |
| bc021684_EX2b      | TGACAAGTTAATGGGTGCAG       |                                  |
| bc021684_EX3a      | TGTGGCAAATGTTGATGTCT       | 396                              |
| bc021684_EX3b      | TTCAATTTTTACCATAGCTACATAGG |                                  |
| bc021684_EX4a      | ACTCTGGCTGCCTTGTGAAT       | 1194                             |
| bc021684_EX4b      | TTTTCCCTTAGCCACATCCT       |                                  |
| BC021693_EP_ex3A   | AAGAGGGTAAGGAAGTGGGG       | Exon3: 58 bp, Product size 651   |
| BC021693_EP_ex3B   | TTTGTGTAGCATACTGGTGTGG     |                                  |
| BC021693_EP_ex4A   | CGGGTGTGGTAATGGAG          | Exon4: 809 bp, Product size 1000 |
| BC021693_EP_ex4B   | TTGTATTCATTTGGACTGTTATGC   |                                  |
| Mars_ex1re-A       | GAGCTGTTTTTCTGGCAAGC       | 862                              |
| Mars_ex1re-B       | TTCTTGGTCCAGGAGACTG        |                                  |
| Mars_ex2re-A       | GGCACCTGTACTCGGCACTA       | 902                              |
| Mars_ex2re-B       | GCAAGTCCTAGGATCCACCA       |                                  |
| Mars_ex2re-C       | GGGGGATTCGTTTCCTGTAT       | 997                              |
| Mars_ex2re-D       | CCCAAAGACTCGAAACATT        |                                  |
| Mars_ex3re-A       | TCTCTGAACCGATGCACTG        | 806                              |
| Mars_ex3re-B       | CCATCTTTCCCCTGAAGACA       |                                  |
| MARS2_LR_FR1-F     | GGGTTTAGACAAACGGCTGA       | 2461                             |
| MARS2_LR_FR1-R     | TGGGCCCTCTCTACTTGCTA       |                                  |
| MARS2_LR_FR2-F     | GGGTTTAGACAAACGGCTGA       | 1699                             |
| MARS2_LR_FR2-R     | AGGGAAGCAGGTAGTGCAGA       |                                  |

| ARSAL CNV ASSAYS | CNV ASSAY_ID  | PROBE POSITIONS & INTERSPACE (bp) |        | EXON |
|------------------|---------------|-----------------------------------|--------|------|
| MARS2            | Hs02277482_cn | 198278558                         |        | 1    |
|                  | Hs02141409_cn | 198279333                         | 775    | 1    |
|                  | Hs01848862_cn | 198279929                         | 596    | 1    |
|                  | Hs02550138_cn | 198280672                         | 743    | 1    |
| HSPD1            | Hs00304988_cn | 198062204                         | 216354 | 4    |
| COQ10            | Hs00506215_cn | 198043117                         | 235441 | 4    |
| PLCL1            | Hs01068343_cn | 198657233                         | 378675 | 3    |
