# Supplementary material for: Mutations in the Mitochondrial Methionyl-tRNA Synthetase Cause a Neurodegenerative Phenotype in Flies and a Recessive Ataxia (ARSAL) in Humans
Source: PubMed Central journal article supplement (PMC3308940; doi:10.1371/journal.pbio.1001288), 2012-03-20
Supplement: pbio.1001288.s012.pdf [file pbio.1001288.s012.pdf]

**Table S5.** Major clinical features and MARS2 mutations in French Canadian individuals with ARSAL

| Patient no. | Gender | Family | Mutation 1 | Mutation 2        | Mutation detection                                   | Age of onset | Ataxia | Spasticity | Dysarthria | Dysmetria | Nystagmus | Dystonia | Scoliosis | U. urgency | Wheelchair use, y | leukodystrophy | Cerebellar atrophy |             |     |     |
|-------------|--------|--------|------------|-------------------|------------------------------------------------------|--------------|--------|------------|------------|-----------|-----------|----------|-----------|------------|-------------------|----------------|--------------------|-------------|-----|-----|
|             |        |        |            |                   |                                                      |              |        |            |            |           |           |          |           |            |                   |                | Vermis             | Hemispheres |     |     |
| 10          | M      | E      | Dup1       | c.681Δ268bpfx236X | PCR, Sequencing, CNV assays, CGH-array, Western Blot | 15           | *      | *          | *          | *         | *         | *        | *         | *          |                   |                | +                  | ++          | ++  |     |
| 11          | M      | E      | Dup1       | c.681Δ268bpfx236X | PCR, Sequencing, CNV assays, Western Blot            | 3            | *      | *          | *          | *         | *         | *        | *         | *          |                   |                |                    |             |     |     |
| 3           | F      | B      | Dup1       | Dup1              | PCR, Sequencing, CNV assays, CGH-array, Western Blot | 3            | *      | *          | *          | *         | *         | *        | *         | *          | *                 | 51             |                    | +           | +   | +   |
| 4           | M      | B      | Dup1       | Dup1              | PCR, Sequencing, CNV assays, CGH-array, Western Blot | 6            | *      | *          | *          | *         | *         | *        | *         | *          | *                 | 19             |                    | +           | +++ | +++ |
| 5           | M      | B      | Dup1       | Dup1              | PCR, Sequencing, CNV assays, Western Blot            | 3            | *      | *          | *          | *         | *         | *        | *         | *          | *                 | 45             |                    | +           | ++  | +   |
| 6           | M      | C      | Dup2       | Dup2              | PCR, Sequencing, CNV assays, Western Blot            | 20           | *      | *          | *          | *         | *         | *        | *         | *          | *                 | 59             |                    | +           | ++  | ++  |
| 8           | F      | C      | Dup2       | Dup2              | PCR, Sequencing, CNV assays, Western Blot            | 17           | *      | *          | *          | *         | *         | *        | *         | *          | *                 |                |                    | -           | ++  | ++  |
| 1           | F      | C      | Dup2       | Dup2              | PCR, Sequencing, CNV assays                          | 47           | *      | *          | *          | *         | *         | *        | *         | *          | *                 |                |                    |             |     |     |
| 2           | M      | C      | Dup2       | Dup2              | PCR, Sequencing, CNV assays                          | 50           | *      | *          | *          | *         | *         | *        | *         | *          | *                 |                |                    |             |     |     |
| 9           | F      | D      | Dup1       | c.681Δ268bpfx236X | PCR, Sequencing, CNV assays, Western Blot            | 13           | *      | *          | *          | *         | *         | *        | *         | *          | *                 | 30             |                    | -           | +   | +   |
| 12          | F      | A      | Dup1       | c.681Δ268bpfx236X | PCR, Sequencing, CNV assays                          | 3            | *      | *          | *          | *         | *         | *        | *         | *          | *                 | 10             |                    | -           | +++ | +++ |
| 13          | F      | A      | Dup1       | c.681Δ268bpfx236X | PCR, Sequencing, CNV assays, CGH-array               | 3            | *      | *          | *          | *         | *         | *        | *         | *          | *                 |                |                    | -           | +++ | +++ |
| 14          | M      | F      | Dup1       | Dup1              | PCR, Sequencing, CNV assays                          | 5            | *      | *          | *          | *         | *         | *        | *         | *          | *                 |                |                    | +           | +   | -   |
| 15          | F      | G      | Dup1       | Dup1              | PCR, Sequencing, CNV assays                          | 3            | *      | *          | *          | *         | *         | *        | *         | *          | *                 | 45             |                    | -           | +++ | +++ |
| 7           | M      | H      | Dup1       | Dup1              | PCR, Sequencing, CNV assays                          | 19           | *      | *          | *          | *         | *         | *        | *         | *          | *                 |                |                    | -           | +++ | +++ |
| 17          | M      | I      | Dup1       | Dup1              | PCR, Sequencing, CNV assays                          | 23           | *      | *          | *          | *         | *         | *        | *         | *          | *                 |                |                    | -           | +++ | +++ |
| 18          | M      | I      | Dup1       | Dup1              | PCR, Sequencing, CNV assays                          | 30           | *      | *          | *          | *         | *         | *        | *         | *          | *                 | 38             |                    | -           | +++ | ++  |
| 16          | F      | J      | Dup1       | Dup2              | PCR, Sequencing, CNV assays                          | 2            | *      | *          | *          | *         | *         | *        | *         | *          | *                 | 36             |                    | -           | +   | -   |
| 21          | F      | K      | Dup1       | Dup1              | PCR, Sequencing, CNV assays                          | 59           | *      | *          | *          | *         | *         | *        | *         | *          | *                 | 72             |                    | -           | +   | +   |
| 18          | F      | L      | Dup1       | Dup2              | PCR, Sequencing, CNV assays                          | 43           | *      | *          | *          | *         | *         | *        | *         | *          | *                 |                |                    | -           | ++  | ++  |
| 19          | M      | M      | Dup1       | Dup2              | PCR, Sequencing, CNV assays                          | 26           | *      | *          | *          | *         | *         | *        | *         | *          | *                 | 38             |                    | +           | ++  | ++  |
| 20          | M      | N      | Dup1       | Dup2              | PCR, Sequencing, CNV assays                          | 4            | *      | *          | *          | *         | *         | *        | *         | *          | *                 |                |                    | -           | +++ | +++ |
| 24          | M      | P      | Dup1       | Dup1              | PCR, Sequencing, CNV assays, Western Blot            | 9            | *      | *          | *          | *         | *         | *        | *         | *          | *                 | 16             |                    | +           | +   | -   |
| 26          | F      | R      | Dup1       | Dup1              | PCR, Sequencing, CNV assays                          | 2            | *      | *          | *          | *         | *         | *        | *         | *          | *                 |                |                    | -           | +++ | +++ |
| 28          | F      | T      | Dup1       | Dup1              | PCR, Sequencing, CNV assays                          | 32           | *      | *          | *          | *         | *         | *        | *         | *          | *                 |                |                    | +           | +++ | +++ |
| 29          | M      | U      | Dup1       | Dup1              | PCR, Sequencing, CNV assays                          | 48           | *      | *          | *          | *         | *         | *        | *         | *          | *                 |                |                    | -           | +   | +   |
| 30          | F      | X      | Dup1       | Dup1              | PCR, Sequencing, CNV assays                          | 50           | *      | *          | *          | *         | *         | *        | *         | *          | *                 |                |                    | -           | +   | -   |
| 31          | M      | Y      | Dup1       | c.681Δ268bpfx236X | PCR, Sequencing, CNV assays                          | 5            | *      | *          | *          | *         | *         | *        | *         | *          | *                 | 14             |                    | -           | +   | -   |
| 32          | M      | Z      | Dup1       | Dup1              | PCR, Sequencing, CNV assays                          | 13           | *      | *          | *          | *         | *         | *        | *         | *          | *                 |                |                    | -           | +++ | +++ |
| 33          | F      | Z      | Dup1       | Dup1              | PCR, Sequencing, CNV assays                          | 48           | *      | *          | *          | *         | *         | *        | *         | *          | *                 |                |                    | +           | +   | +   |
| 34          | M      | AA     | Dup1       | Dup2              | PCR, Sequencing, CNV assays                          | 29           | *      | *          | *          | *         | *         | *        | *         | *          | *                 |                |                    | -           | +   | +   |
| 35          | F      | AA     | Dup1       | Dup2              | PCR, Sequencing, CNV assays, Western Blot            | 26           | *      | *          | *          | *         | *         | *        | *         | *          | *                 |                |                    | -           | ++  | ++  |
| 36          | M      | BB     | Dup1       | c.681Δ268bpfx236X | PCR, Sequencing, CNV assays                          | 16           | *      | *          | *          | *         | *         | *        | *         | *          | *                 |                |                    | -           | +   | +   |
| 37          | M      | CC     | Dup1       | Dup1              | PCR, Sequencing, CNV assays                          | 28           | *      | *          | *          | *         | *         | *        | *         | *          | *                 | 53             |                    | -           | +++ | ++  |
| 38          | M      | DD     | Dup1       | Dup2              | PCR, Sequencing, CNV assays                          | 36           | *      | *          | *          | *         | *         | *        | *         | *          | *                 |                |                    | -           | +   | +   |
| 39          | M      | DD     | Dup1       | Dup2              | PCR, Sequencing, CNV assays, Western Blot            | 40           | *      | *          | *          | *         | *         | *        | *         | *          | *                 |                |                    | -           | -   | -   |
| 40          | F      | DD     | Dup1       | Dup2              | PCR, Sequencing, CNV assays, Western Blot            | 35           | *      | *          | *          | *         | *         | *        | *         | *          | *                 |                |                    | -           | ++  | ++  |
| 41          | M      | EE     | Dup1       | Dup1              | PCR, Sequencing, CNV assays, Western Blot            | 25           | *      | *          | *          | *         | *         | *        | *         | *          | *                 |                |                    | -           | -   | -   |
| 42          | M      | FF     | Dup1       | Dup1              | PCR, Sequencing, CNV assays                          | 30           | *      | *          | *          | *         | *         | *        | *         | *          | *                 |                |                    | -           | +   | +   |
| 43          | F      | GG     | Dup2       | Dup2              | PCR, Sequencing, CNV assays                          | 30           | *      | *          | *          | *         | *         | *        | *         | *          | *                 |                |                    | +           | ++  | ++  |
| 44          | F      | HH     | Dup1       | c.681Δ268bpfx236X | PCR, Sequencing, CNV assays, Western Blot            | 13           | *      | *          | *          | *         | *         | *        | *         | *          | *                 |                |                    | +           | +   | -   |
| 45          | M      | HH     | Dup1       | c.681Δ268bpfx236X | PCR, Sequencing, CNV assays, Western Blot            | 14           | *      | *          | *          | *         | *         | *        | *         | *          | *                 |                |                    | +           | -   | -   |
| 46          | M      | II     | Dup2       | Dup2              | PCR, Sequencing, CNV assays                          | 32           | *      | *          | *          | *         | *         | *        | *         | *          | *                 |                |                    | -           | -   | -   |
| 47          | M      | II     | Dup2       | Dup2              | PCR, Sequencing, CNV assays                          | 44           | *      | *          | *          | *         | *         | *        | *         | *          | *                 |                |                    | -           | -   | -   |
| 48          | M      | JJ     | Dup1       | Dup1              | PCR, Sequencing, CNV assays                          | 41           | *      | *          | *          | *         | *         | *        | *         | *          | *                 |                |                    | +           | -   | -   |
| 49          | F      | KK     | Dup1       | Dup2              | PCR, Sequencing, CNV assays                          | 37           | *      | *          | *          | *         | *         | *        | *         | *          | *                 |                |                    | -           | +++ | ++  |
| 50          | M      | KK     | Dup1       | Dup2              | PCR, Sequencing, CNV assays                          | 20           | *      | *          | *          | *         | *         | *        | *         | *          | *                 | 42             |                    | -           | +++ | +++ |
| 51          | F      | KK     | Dup1       | Dup2              | PCR, Sequencing, CNV assays                          | 38           | *      | *          | *          | *         | *         | *        | *         | *          | *                 |                |                    | +           | +   | +   |
| 52          | M      | LL     | Dup1       | Dup1              | PCR, Sequencing, CNV assays                          | 13           | *      | *          | *          | *         | *         | *        | *         | *          | *                 |                |                    | +           | +   | +   |
| 53          | F      | MM     | Dup1       | Dup1              | PCR, Sequencing, CNV assays                          | 40           | *      | *          | *          | *         | *         | *        | *         | *          | *                 |                |                    | -           | +++ | +++ |
| 54          | M      | NN     | Dup1       | Dup2              | PCR, Sequencing, CNV assays                          | 40           | *      | *          | *          | *         | *         | *        | *         | *          | *                 | 51             |                    | +           | +++ | -   |
| 55          | F      | OO     | Dup1       | Dup1              | PCR, Sequencing, CNV assays                          | 45           | *      | *          | *          | *         | *         | *        | *         | *          | *                 | 59             |                    | -           | ++  | ++  |
| 56          | F      | PP     | Dup1       | Dup1              | PCR, Sequencing, CNV assays                          | 2            | *      | *          | *          | *         | *         | *        | *         | *          | *                 |                |                    | -           | +++ | -   |
| 57          | F      | RR     | Dup1       | Dup1              | PCR, Sequencing, CNV assays                          | 40           | *      | *          | *          | *         | *         | *        | *         | *          | *                 |                |                    | -           | +   | +   |
| Mean/%      |        |        |            |                   |                                                      | 24.4         | 100%   | 100%       | 78%        | 57%       | 44%       | 28%      | 17%       | 48%        | 39.9              |                | 40%                | 93%         | 75% |     |

Legend:  
Dup1: Duplication 1; Dup2: Duplication 2; U. urgency: urinary urgency; y: year; CNV: Copy number variation; CGH: copy genomic hybridization
