# Supplementary material for: Mutations in the Mitochondrial Methionyl-tRNA Synthetase Cause a Neurodegenerative Phenotype in Flies and a Recessive Ataxia (ARSAL) in Humans
Source: PubMed Central journal article supplement (PMC3308940; doi:10.1371/journal.pbio.1001288), 2012-03-20
Supplement: pbio.1001288.s013.pdf [file pbio.1001288.s013.pdf]

**Table S6.** Quantification of mitochondrial protein synthesis

|                | <b>C1</b> | <b>C2</b> | <b>C3</b>  | <b>DD38</b> | <b>B4</b> | <b>E10</b> | <b>P24</b> | <b>B5</b> | <b>AA35</b> |
|----------------|-----------|-----------|------------|-------------|-----------|------------|------------|-----------|-------------|
| <b>%</b>       | <b>80</b> | <b>97</b> | <b>105</b> | <b>118</b>  | <b>54</b> | <b>89</b>  | <b>67</b>  | <b>79</b> | <b>107</b>  |
| <b>ND5</b>     | 105       | 91        | 99         | 105         | 32        | 75         | 50         | 28        | 103         |
| <b>CO I</b>    | 80        | 98        | 104        | 119         | 54        | 96         | 71         | 69        | 111         |
| <b>ND4</b>     | 97        | 120       | 79         | 104         | 22        | 67         | 58         | 75        | 102         |
| <b>Cyt b</b>   | 71        | 99        | 98         | 133         | 57        | 74         | 45         | 115       | 86          |
| <b>ND2</b>     | 77        | 90        | 111        | 122         | 49        | 79         | 53         | 88        | 113         |
| <b>ND1</b>     | 45        | 74        | 98         | 182         | 36        | 81         | 31         | 87        | 115         |
| <b>CO III</b>  | 71        | 104       | 96         | 128         | 57        | 84         | 60         | 81        | 103         |
| <b>CO II</b>   | 74        | 91        | 109        | 126         | 55        | 80         | 66         | 84        | 97          |
| <b>ATP6</b>    | 98        | 112       | 88         | 102         | 51        | 119        | 83         | 95        | 107         |
| <b>ND6</b>     | 96        | 104       | 116        | 84          | 60        | 90         | 100        | 80        | 116         |
| <b>ND3</b>     | 85        | 89        | 127        | 100         | 52        | 82         | 78         | 61        | 91          |
| <b>A8/ND4L</b> | 87        | 96        | 128        | 89          | 90        | 117        | 97         | 101       | 118         |
