# Supplementary material for: Mutations in the Mitochondrial Methionyl-tRNA Synthetase Cause a Neurodegenerative Phenotype in Flies and a Recessive Ataxia (ARSAL) in Humans
Source: PubMed Central journal article supplement (PMC3308940; doi:10.1371/journal.pbio.1001288), 2012-03-20
Supplement: pbio.1001288.s014.pdf [file pbio.1001288.s014.pdf]

Table S7. Major clinical features of patients with AARS diseases

| Human Disease           | Ataxia with leukoencephalopathy                      | Leukoencephalopathy              | Pontocerebellar Hypoplasia             | Myopathy, Lactic Acidosis, and Sideroblastic Anemia | Charcot-Marie-Tooth disease type 2 [CMT2D] | Charcot-Marie-Tooth disease type 2 [CMT2N] |
|-------------------------|------------------------------------------------------|----------------------------------|----------------------------------------|-----------------------------------------------------|--------------------------------------------|--------------------------------------------|
|                         | [ARSAL]                                              | [LBSL]                           | [PCH6]                                 | [MLASA]                                             | [CMT2D]                                    | [CMT2N]                                    |
| Chromosome              | Recessive<br>2q33                                    | Recessive<br>1q25.1              | Recessive<br>6q16.1                    | Recessive<br>12q11.21                               | Dominant<br>7p15                           | Dominant<br>16q,21-23                      |
| Genes                   | <i>MARS2</i>                                         | <i>DARS2</i>                     | <i>RARS2</i>                           | <i>YARS2</i>                                        | <i>GARS</i>                                | <i>AARS</i>                                |
| Cell Localization       | Mito.                                                | Mito.                            | Mito.                                  | Mito.                                               | Mito./Cytoplasm                            | Cytoplasm                                  |
| Age at diagnosis        | 2-59                                                 | childhood                        | 3 days                                 | Childhood                                           | childhood                                  | Adult                                      |
| Lactate elevation       | Unknown                                              | Yes                              | CSF lactate                            | Yes                                                 | No                                         | No                                         |
| Dysphagia               | No                                                   | Unknown                          | Unknown                                | Yes                                                 | No                                         | No                                         |
| Myopathy                | No                                                   | No                               | No                                     | Yes                                                 | Yes                                        | Yes                                        |
| Spasticity              | yes                                                  | Yes                              | Yes                                    | No                                                  | No                                         | No                                         |
| Ataxia                  | Yes                                                  | Yes                              | Unknown                                | No                                                  | No                                         | No                                         |
| Dystonia                | Yes                                                  | Yes                              | Yes                                    | No                                                  | No                                         | No                                         |
| White matter changes    | Yes                                                  | Yes                              | Yes                                    | Unknown                                             | No                                         | No                                         |
| Cerebellar atrophy      | Yes                                                  | Yes                              | Yes                                    | Unknown                                             | No                                         | No                                         |
| Corpus callosum atrophy | Yes                                                  | Yes                              | Yes                                    | Unknown                                             | No                                         | No                                         |
| Sensory involvement     | No                                                   | Yes                              | Unknown                                | No                                                  | Yes                                        | Yes                                        |
| Neuropathy              | No                                                   | No                               | No                                     | No                                                  | Yes                                        | Yes                                        |
| Liver Disease           | No                                                   | Unknown                          | Unknown                                | Unknown                                             | No                                         | No                                         |
| Ovarian Dysgenesis      | No                                                   | Unknown                          | Unknown                                | Unknown                                             | No                                         | No                                         |
| Pulmonary Disease       | No                                                   | Unknown                          | Unknown                                | Unknown                                             | No                                         | No                                         |
| Renal Disease           | No                                                   | Unknown                          | Unknown                                | Unknown                                             | No                                         | No                                         |
| Diabetes                |                                                      |                                  |                                        |                                                     |                                            |                                            |
| Mental retardation      | Yes                                                  | Yes                              | Yes                                    | Yes                                                 | Rare                                       | No                                         |
| References:             | Brain. 2006 Sep;129(Pt 9):2332-40. ; this manuscript | Nat Genet. 2007 Apr;39(4):534-9. | Am J Hum Genet. 2007 Oct;81(4):857-62. | Am J Hum Genet. 2010 Jul 9;87(1):52-9.              | PNAS 2007 Jul 3;104(27):11239-44.          | Am J Hum Genet. 2010 Jan 8;86(4):77-82.    |

| Human Disease           | Charcot-Marie-Tooth disease [DI CMT]      | Intermediate Peripheral Neuropathy CMT-Like | Ovarian Dysgenesis and sensorineural hearing loss Perrault Syndrome | Infantile Mitochondrial Cardiomyopathy [CPM] | Hyperuricemia, pulmonary hypertension, renal failure in infancy and alkalosis HUPRA | Type 2 diabetes susceptibility gene |
|-------------------------|-------------------------------------------|---------------------------------------------|---------------------------------------------------------------------|----------------------------------------------|-------------------------------------------------------------------------------------|-------------------------------------|
| Chromosome              | Dominant<br>1p34-35                       | Dominant<br>16q23-1                         | Recessive<br>5q31                                                   | Recessive<br>6q21.1                          |                                                                                     | Complex<br>3p21.3                   |
| Genes                   | <i>YARS</i>                               | <i>KARS</i>                                 | <i>HARS2</i>                                                        | <i>AARS2</i>                                 | <i>SARS2</i>                                                                        | <i>LARS2</i>                        |
| Cell Localization       | Cytoplasm                                 | Mito./Cytoplasm                             | Mito.                                                               | Mito.                                        | Mito.                                                                               | Mito.                               |
| Age at diagnosis        | Children-Adult                            | Children-Adult                              | Adult                                                               | Childhood                                    | Childhood                                                                           | Adult                               |
| Lactate elevation       | No                                        | No                                          | Unknown                                                             | Yes                                          | Yes                                                                                 | Unknown                             |
| Dysphagia               | No                                        | No                                          | No                                                                  | Yes                                          | Unknown                                                                             | No                                  |
| Myopathy                | Yes                                       | Yes                                         | No                                                                  | Yes                                          | No                                                                                  | No                                  |
| Spasticity              | No                                        | No                                          | No                                                                  | Yes                                          | No                                                                                  | Unknown                             |
| Ataxia                  | No                                        | No                                          | No                                                                  | Unknown                                      | No                                                                                  | Unknown                             |
| Dystonia                | No                                        | No                                          | No                                                                  | Unknown                                      | Unknown                                                                             | Unknown                             |
| White matter changes    | No                                        | No                                          | Unknown                                                             | Unknown                                      | Unknown                                                                             | Unknown                             |
| Cerebellar atrophy      | No                                        | No                                          | Unknown                                                             | Unknown                                      | Unknown                                                                             | Unknown                             |
| Corpus callosum atrophy | No                                        | No                                          | Unknown                                                             | Unknown                                      | Unknown                                                                             | Unknown                             |
| Sensory involvement     | Yes                                       | Yes                                         | Yes                                                                 | Yes                                          | Unknown                                                                             | Unknown                             |
| Neuropathy              | Yes                                       | Yes                                         | No                                                                  | Yes                                          | Unknown                                                                             | Yes                                 |
| Liver Disease           | No                                        | No                                          | No                                                                  | No                                           | No                                                                                  | Unknown                             |
| Ovarian Dysgenesis      | No                                        | No                                          | Yes                                                                 | Unknown                                      | Unknown                                                                             | Unknown                             |
| Pulmonary Disease       | No                                        | No                                          | No                                                                  | Yes                                          | Yes                                                                                 | Unknown                             |
| Renal Disease           | No                                        | No                                          | No                                                                  | No                                           | Yes                                                                                 | Unknown                             |
| Diabetes                |                                           |                                             |                                                                     |                                              | Yes                                                                                 | Yes                                 |
| Mental retardation      | No                                        | Yes                                         | No                                                                  | Unknown                                      | Yes                                                                                 | Unknown                             |
| References:             | Mol Cell Neurosci. 2011 Feb;46(2):432-43. | Am J Hum Genet. 2010 Oct 8;87(4):560-6.     | PNAS 2011 Apr 19;108(16):6543-8.                                    | Am J Hum Genet. 2011 May 13;88(5):635-42.    | Am J Hum Genet. 2011 Feb 11;88(2):193-200.                                          | Diabetes. 2005 Jun;54(6):1892-5.    |
